# Supplementary material for: Diversity of blaCTX-M-1-carrying plasmids recovered from Escherichia coli isolated from Canadian domestic animals
Source: PLoS One. 2022 Mar 16;17(3):e0264439. doi: 10.1371/journal.pone.0264439 (PMC8926264; doi:10.1371/journal.pone.0264439)
Supplement: S3 Table — The numbers in the cells represent the number of SNP between the plasmids in comparison. Plasmid names are colour-coded by the animal species from which they were recovered. (XLSX) [file pone.0264439.s005.xlsx]

## Sheet: Sheet1
	Sequence type	pAC86.2	pAC30.1	pAC26.1	pAC87.1	pAC43.1	pAC101.1	pAC112.1	pAC113.1	p10068_CzechRepublic_ST2	pAC6.1	pAC52.1	p15S04829-4_Netherlands_ST9	pAC48-1-1	p99783-3T_CzechRepublic_ST9	p100063-3_CzechRepublic_ST9	p15S04714-1_Netherlands_ST9	p15S04779-4_Netherlands_ST9	p97974-2T_CzechRepublic_ST9	p99063_CzechRepublic_ST9	p99975-2_CzechRepublic_ST9
pAC86.2	2	0	325	268	302	231	245	216	217	173	174	171	264	179	243	240	186	241	242	243	242
pAC30.1	2	325	0	258	213	307	189	176	166	226	188	169	249	218	225	226	211	231	233	231	232
pAC26.1	2	268	258	0	216	246	179	160	164	179	133	133	203	191	184	190	188	191	193	192	192
pAC87.1	2	302	213	216	0	219	163	131	150	177	122	110	194	176	173	180	170	178	180	180	179
pAC43.1	2	231	307	246	219	0	228	181	207	230	160	169	163	162	153	161	157	160	154	163	161
pAC101.1	2	245	189	179	163	228	0	92	108	137	89	72	150	144	125	131	130	134	135	136	135
pAC112.1	2	216	176	160	131	181	92	0	79	113	56	50	128	122	106	111	108	112	114	114	113
pAC113.1	2	217	166	164	150	207	108	79	0	119	61	50	134	121	116	113	113	111	107	113	112
p10068_CzechRepublic	2	173	226	179	177	230	137	113	119	0	93	75	114	84	96	105	97	104	107	107	105
pAC6.1	2	174	188	133	122	160	89	56	61	93	0	27	108	89	90	89	86	87	89	89	88
pAC52.1	2	171	169	133	110	169	72	50	50	75	27	0	92	72	75	70	72	69	71	71	70
p15S04829-4_Netherlands	9	264	249	203	194	163	150	128	134	114	108	92	0	21	20	27	13	25	27	27	26
pAC48-1-1	9	179	218	191	176	162	144	122	121	84	89	72	21	0	19	14	7	12	13	14	13
p99783-3T_CzechRepublic	9	243	225	184	173	153	125	106	116	96	90	75	20	19	0	6	3	7	9	6	8
p100063-3_CzechRepublic	9	240	226	190	180	161	131	111	113	105	89	70	27	14	6	0	5	2	4	0	3
p15S04714-1_Netherlands	9	186	211	188	170	157	130	108	113	97	86	72	13	7	3	5	0	3	4	5	4
p15S04779-4_Netherlands	9	241	231	191	178	160	134	112	111	104	87	69	25	12	7	2	3	0	2	2	1
p97974-2T_CzechRepublic	9	242	233	193	180	154	135	114	107	107	89	71	27	13	9	4	4	2	0	4	1
p99063_CzechRepublic	9	243	231	192	180	163	136	114	113	107	89	71	27	14	6	0	5	2	4	0	3
p99975-2_CzechRepublic	9	242	232	192	179	161	135	113	112	105	88	70	26	13	8	3	4	1	1	3	0
Legend
Animal	Colour
Horse	Orange
Dog	Yellow
